# Supplementary material
Source: MDPI journal article supplement (https://www.mdpi.com/2073-445X/12/5/1090)
Supplement: s1 [file s1]

## Pugh & Field (submitted to *Land*) – Supplementary material

### Section S1 – systematic literature search

**Table S1:** Papers identified from a systematic literature search (14/115 searched) **partitioning taxonomic and functional  $\beta$**  into nestedness and turnover components in order to **quantify the impact of disturbances on community dissimilarity**. Local taxo/func = local scale taxonomic/functional  $\beta$ , regional taxo/func = regional scale taxonomic/functional  $\beta$  and continental taxo/func = continental scale taxonomic/functional  $\beta$ . No clear definition for study scales (local, regional or taxonomic) was used due to differences between study systems e.g. aquatic stream habitats to urban greenspaces, instead conclusions were put into the most suitable category. Note that 2/14 studies are experimental and disturbance types, frequencies, intensities and study periods differ greatly between studies. Additionally, most studies focus on a single spatial scale. Search terms used in 'Web of Science' and 'Google Scholar' were; 1) "Beta diversity" AND "Functional" AND "Partitioning" and 2) "Beta diversity" AND "Functional" AND "Disturbance", papers were sorted by relevance and the top 20 were selected and searched by abstract/methods. Additionally, using 'Scite\_' papers citing Villéger et al, 2013 (all 45 papers selected) and Baselga, 2010 (top 30 papers selected) in their methods sections were sorted by relevance and searched by abstract/methods. **Blue** = dominance of nestedness, **orange** = dominance of turnover and **green** = both and blank = no clear pattern.

| Reference                    | Disturbance Regime                                                      | Traits                                                                                                                                                                 | Taxa                                       | Local Taxo                                                                                                                                                     | Regional Taxo | Continental Taxo                                                          | Local Func                                                                                                                       | Regional Func | Continental Func                                                                     | Temporal Scale                                 | Study Type    |
|------------------------------|-------------------------------------------------------------------------|------------------------------------------------------------------------------------------------------------------------------------------------------------------------|--------------------------------------------|----------------------------------------------------------------------------------------------------------------------------------------------------------------|---------------|---------------------------------------------------------------------------|----------------------------------------------------------------------------------------------------------------------------------|---------------|--------------------------------------------------------------------------------------|------------------------------------------------|---------------|
| Aspin et al, 2018            | Drought                                                                 | Forty-nine biological (not ecological) functional traits spanning ten grouping features at the genus level (see paper for details)                                     | Stream invertebrates                       | Drought intensification decreased taxonomic $\beta$ (distance decay from non-disturbed driven by turnover)                                                     | N/A           | N/A                                                                       | Drought intensification decreased functional $\beta$ (distance decay from non-disturbed driven by turnover and nestedness)       | N/A           | N/A                                                                                  | 18-month period                                | Experimental  |
| Barbet-Massin and Jetz, 2015 | Future climate change scenarios                                         | Foraging type, foraging height, body size, and activity time (diurnal/nocturnal).                                                                                      | Birds                                      | N/A                                                                                                                                                            | N/A           | No clear pattern                                                          | N/A                                                                                                                              | N/A           | No clear pattern                                                                     | Future predictions of range sizes by 2080-2099 | Observational |
| Barnagaud et al, 2017        | Human impact (human influence index)                                    | Nine ecological traits representing six key aspects of bird ecology; diet, habitat use, thermal preference, migration, dispersal and body size (see paper for details) | Birds                                      | N/A                                                                                                                                                            | N/A           | Increasing human impact reduced turnover indicating biotic homogenisation | N/A                                                                                                                              | N/A           | Increasing human impact reduced turnover indicating functional biotic homogenisation | Current                                        | Observational |
| Braghin et al, 2018          | Lakes associated with dammed (disturbed) rivers versus preserved rivers | Mean body length, habitat preference, feeding type, life span, reproduction and predatory escape response                                                              | Zooplankton                                | Same total dissimilarity in dammed and preserved river lakes but nestedness was higher in the dammed river (loss of species)                                   | N/A           | N/A                                                                       | Lower total dissimilarity in dammed than preserved river lakes and nestedness was higher in the dammed river (loss of functions) | N/A           | N/A                                                                                  | Current                                        | Observational |
| Brice et al, 2017            | Urbanisation and flooding                                               | Maximum height, life-form, shade tolerance, wetness coefficient, seed weight, seed bank, reproduction, diaspore morphology, seed buoyancy                              | Herbaceous communities in riparian forests | Urbanisation led to higher taxonomic $\beta$ driven by turnover and nestedness, flooding led to lower taxonomic $\beta$ also driven by turnover and nestedness | N/A           | N/A                                                                       | Urbanisation led to higher functional $\beta$ driven by turnover and nestedness, flooding led to lower functional $\beta$        | N/A           | N/A                                                                                  | Current                                        | Observational |

|                          |                                                                                                                                          |                                                                                                                                                                                                                                                                                                                                                                                                                    |                               |                                                                                                                                                                                                                                                                                                      |                                                                                                                     |     |                                                                                                                                                                       |                                                                                                                          |     |                       |               |
|--------------------------|------------------------------------------------------------------------------------------------------------------------------------------|--------------------------------------------------------------------------------------------------------------------------------------------------------------------------------------------------------------------------------------------------------------------------------------------------------------------------------------------------------------------------------------------------------------------|-------------------------------|------------------------------------------------------------------------------------------------------------------------------------------------------------------------------------------------------------------------------------------------------------------------------------------------------|---------------------------------------------------------------------------------------------------------------------|-----|-----------------------------------------------------------------------------------------------------------------------------------------------------------------------|--------------------------------------------------------------------------------------------------------------------------|-----|-----------------------|---------------|
|                          |                                                                                                                                          |                                                                                                                                                                                                                                                                                                                                                                                                                    |                               |                                                                                                                                                                                                                                                                                                      |                                                                                                                     |     | also driven by turnover and nestedness                                                                                                                                |                                                                                                                          |     |                       |               |
| Closset-Kopp et al, 2018 | Managed forest patches versus unmanaged patches                                                                                          | Total cover (tree, shrub and combined layers), cover-weighted mean of shade-casting ability, community specialization index, overstory species litter quality indices, major tree species relative cover, community CSR, proportion of dispersal modes, cover-abundance-weighted means of Ellenberg's indicator values for: light, temperature, continentality, soil pH, soil nutrient, soil moisture and browsing | Understory plant communities  | High total dissimilarity between 1970 and 2015 driven by both nestedness and turnover for both managed and unmanaged plots and between soil types                                                                                                                                                    | N/A                                                                                                                 | N/A | High total dissimilarity driven by high nestedness and low turnover indicating functional convergence for both managed and unmanaged plots and between soil types     | N/A                                                                                                                      | N/A | Between 1970 and 2015 | Observational |
| Crabot et al, 2021       | Impacts of drying disturbance on historically drying (HD) and recently drying (RD) rivers                                                | Life cycle duration, potential number of cycles per year, reproduction, dispersal, resistance forms, respiration, locomotion and substrate relation                                                                                                                                                                                                                                                                | Aquatic invertebrates         | In RD (more disturbed) networks taxonomic temporal total dissimilarity higher than HD and driven by turnover which was higher at intermittent (as opposed to perennial) sites, spatial total dissimilarity was also higher in RD networks with high turnover and more turnover in intermittent sites | N/A                                                                                                                 | N/A | Temporal and spatial functional total dissimilarity was high in RD and HD sites whether perennial or intermittent and was driven primarily by nestedness in all sites | N/A                                                                                                                      | N/A | 2012 to 2015          | Observational |
| Fournier et al, 2018     | Urbanisation effects between the regional species pool and urban (allotments, gardens, parks, brownfields and green roofs) species pools | Bees: Phenology start, phenology duration, feeding preferences (lecty), tongue length, inter-tegula distance, nesting mode, social status, type of voltinism and Carabid beetles: Phenology start, phenology duration, feeding preferences, mean and variation in body size, overwintering stage, dispersal mode (wing form), elevational optimum, elevational range and drought tolerance                         | Carabid beetles and wild bees | N/A                                                                                                                                                                                                                                                                                                  | High dissimilarity driven primarily by turnover (taxonomic divergence in species identities) in urban species pools | N/A | N/A                                                                                                                                                                   | Functional convergence driven primarily by nestedness in urban species pools compared to rural pools (loss of functions) | N/A | Current               | Observational |
| Fu et al, 2019           | Phosphorus concentration gradient (total phosphorus)                                                                                     | Growth form, life history, shoot height, stem diameter, specific leaf area, leaf dry mass content, lamina thickness, stem dry mass content, and mean Julian flowering dates and flowering duration                                                                                                                                                                                                                 | Lake macrophytes              | Higher phosphorus decreased taxonomic total dissimilarity and turnover at the transect scale                                                                                                                                                                                                         | Higher phosphorus decreased total dissimilarity and turnover at the lake scale                                      | N/A | Higher phosphorus decreased functional total dissimilarity and nestedness at the lake scale                                                                           | Stronger impact of regional environmental drivers e.g. altitude promoting functional nestedness                          | N/A | Current               | Observational |

|                           |                                                                                                                                            |                                                                                                                                                                                                                                   |                             |                                                                                                                                         |                                                                                        |     |                                                                                                                                        |                                                                                                                                                                                                                                           |     |                                                           |               |
|---------------------------|--------------------------------------------------------------------------------------------------------------------------------------------|-----------------------------------------------------------------------------------------------------------------------------------------------------------------------------------------------------------------------------------|-----------------------------|-----------------------------------------------------------------------------------------------------------------------------------------|----------------------------------------------------------------------------------------|-----|----------------------------------------------------------------------------------------------------------------------------------------|-------------------------------------------------------------------------------------------------------------------------------------------------------------------------------------------------------------------------------------------|-----|-----------------------------------------------------------|---------------|
| Leigh et al, Drought 2019 |                                                                                                                                            | Eighty-nine fuzzy-coded functional trait categories describing ecological preferences and life-history traits (see paper for details)                                                                                             | Aquatic macro-invertebrates | High total dissimilarity driven by turnover meaning that new colonists were not equivalent to original assemblages                      | N/A                                                                                    | N/A | High total dissimilarity driven by higher turnover and nestedness than control indicating a loss of functions in disturbed communities | N/A                                                                                                                                                                                                                                       | N/A | 2-year period                                             | Experimental  |
| Liu and Wang, 2018        | Comparison between lakes connected to the Yangtze river and unconnected (more disturbed) lakes (loss of lateral hydrological connectivity) | Migration type, vertical position, longevity, sexual maturity age of female, fecundity, egg type, maximum body length, body length/body depth, caudal peduncle length/body length, eye diameter/head length, mouth position, diet | Fish                        | Taxonomic total dissimilarity higher in disconnected lakes and driven primarily by turnover (>70%)                                      | N/A                                                                                    | N/A | Functional total dissimilarity lower than taxonomic and higher in disconnected lakes and driven primarily by nestedness (>70%)         | N/A                                                                                                                                                                                                                                       | N/A | Current                                                   | Observational |
| Mathers et al, 2020       | Invasive crayfish                                                                                                                          | Sixty-three biological traits (11 grouping features) and 13 ecological traits (two grouping features) (see paper for details)                                                                                                     | Lotic macro-invertebrates   | N/A                                                                                                                                     | Increases in taxonomic richness seen in control rivers not seen in invaded rivers      | N/A | N/A                                                                                                                                    | Higher functional nestedness in two of three invaded rivers compared to control rivers (loss of functions), third region displayed no change                                                                                              | N/A | Between 1990 and 2013                                     | Observational |
| Nielsen and Totland, 2014 | Old growth forest (least disturbed), young forest (intermediate) and clear cuts (most disturbed)                                           | Used 'Netcarto' to calculate species-level 'ecological functional role' within the networks, by assessing species-level 'network functional role'                                                                                 | Pollination networks        | Higher total dissimilarity in disturbed sites but greater turnover in least disturbed sites indicating homogenisation under disturbance | N/A                                                                                    | N/A | No clear pattern but likely a change in functional roles following disturbance                                                         | N/A                                                                                                                                                                                                                                       | N/A | Forest: Current, young (13–35 years) and old (>100 years) | Observational |
| Pereyra et al, 2018       | 3 land uses; suburban, tobacco monoculture and forest                                                                                      | Reproductive mode, maximum male size (mm), ecomorphological guild of tadpoles, general habitat use of adult frogs and reproductive activity patterns                                                                              | Anuran amphibians           | N/A                                                                                                                                     | Low species total dissimilarity (mainly turnover) between three land use types (<0.25) | N/A | N/A                                                                                                                                    | High functional total dissimilarity (>0.7) between land uses, differences between forests and tobacco monoculture almost entirely nestedness (loss of functions from forest) whereas forest and suburban dissimilarity driven by turnover | N/A | Current                                                   | Observational |

## Section S2 – Determining quadrat size

Six canal towpath site coordinates were selected using a random number generator. At each site  $0.25\text{m}^2$  ( $0.25\text{m} \times 1\text{m}$ ),  $0.5\text{m}^2$  ( $0.5\text{m} \times 1\text{m}$ ),  $1\text{m}^2$  ( $0.5\text{m} \times 2\text{m}$ ),  $1.5\text{m}^2$ ,  $2\text{m}^2$  and  $2.5\text{m}^2$  quadrats were sampled visually for plant species incidence and abundances (% of three-dimensional quadrat covered by each plant species minus the bare ground cover). Visual estimation of abundances by a single observer (eliminating observer bias) was selected as accuracy is comparable to pin-point and imagery analysis methods (Ringvall et al, 2005; Seefeldt and Booth, 2006; Damgaard, 2014). There was no levelling off in the species-accumulation curve with increasing plot size (Figure-5). However, due to time constraints, some literary evidence (although mixed) for increased visual abundance estimation accuracy with smaller quadrat size and the practicality that many bank engineering sites had dimensions of  $0.5\text{m} \times 2\text{m}$ ,  $1\text{m}^2$  was selected as the most suitable quadrat size for this study (Sykes et al, 1983; Kenkel and Podani, 1991; Milberg et al, 2008).

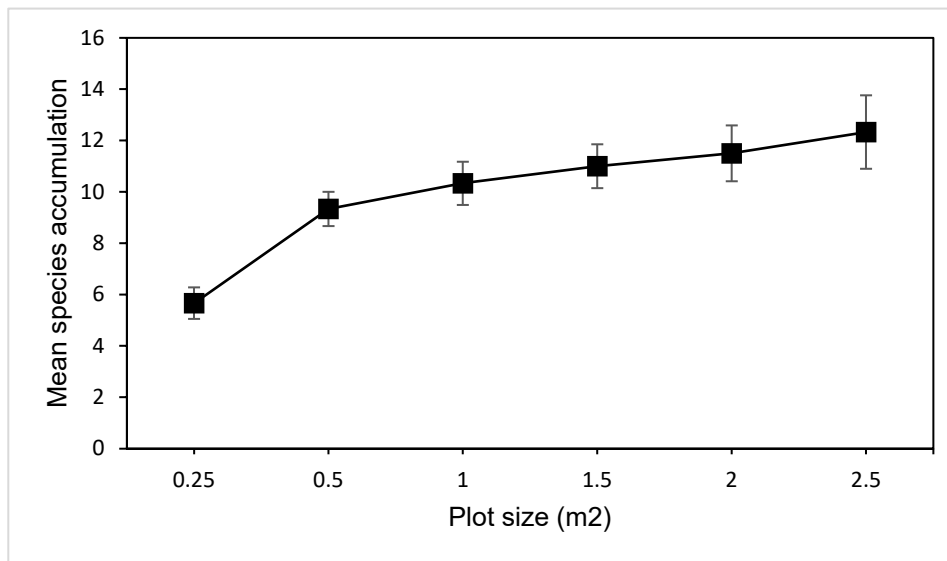

**Figure S1:** Mean species accumulation for 6 randomly selected sites along the Basingstoke Canal with increasing quadrat size ( $0.25\text{m}^2$  ( $0.25\text{m} \times 1\text{m}$ ),  $0.5\text{m}^2$  ( $0.5\text{m} \times 1\text{m}$ ),  $1\text{m}^2$  ( $0.5\text{m} \times 2\text{m}$ ),  $1.5\text{m}^2$  ( $0.5\text{m} \times 3\text{m}$ ),  $2\text{m}^2$  ( $0.5\text{m} \times 4\text{m}$ ) and  $2.5\text{m}^2$  ( $0.5\text{m} \times 5\text{m}$ )). One standard error is displayed for each mean accumulation value.

## Section S3 – supplementary figure

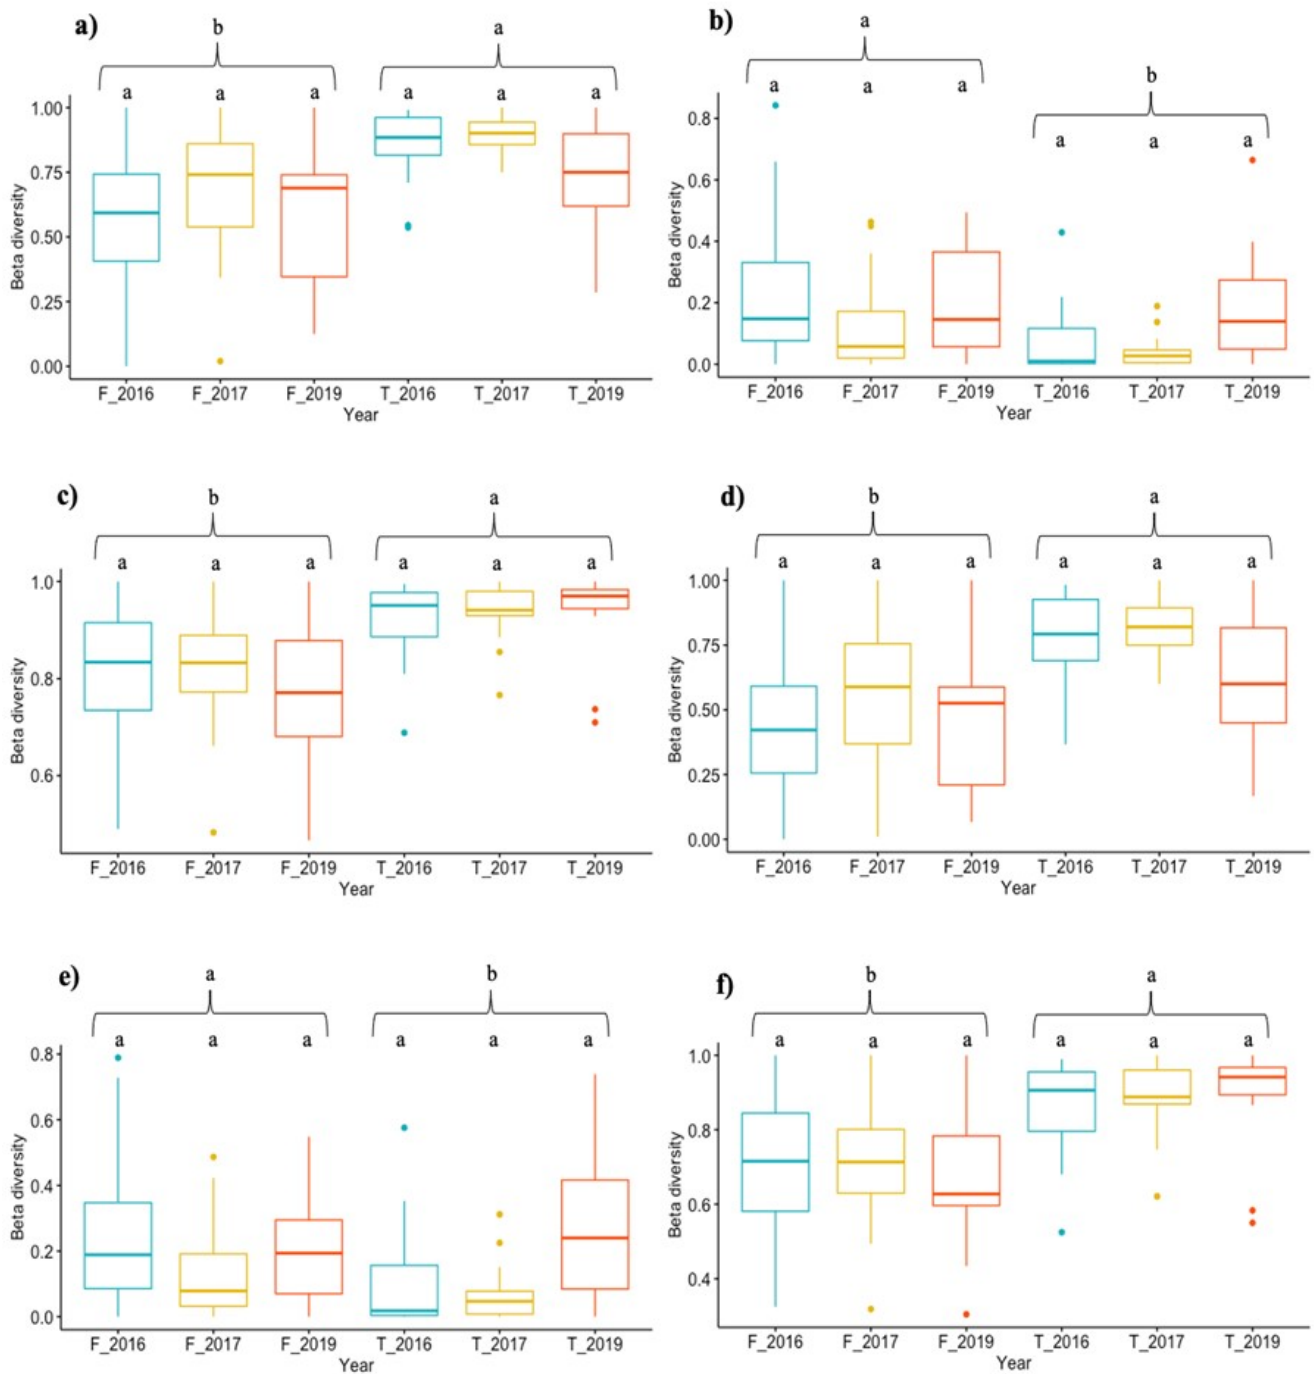

**Figure S2:** Box plots displaying significance of a two-way ANOVA with interactions with years (2016, 2017 and 2019) and beta diversity type (functional and taxonomic) as fixed factors and partitioned between-site beta diversity as the response variable (turnover, nestedness-resultant and total dissimilarity) for the Jaccard and Sørensen families of indices. 'F' indicates functional diversity and 'T' indicates taxonomic diversity with 2016 represented in 'blue', 2017 in 'yellow' and 2019 in 'red'. Different letters indicate statistical significance at  $P \leq 0.05$  between groups. a) Jaccard turnover, b) Jaccard nestedness-resultant, c) Jaccard total dissimilarity, d) Sørensen turnover, e) Sørensen nestedness-resultant and f) Sørensen total dissimilarity.

## References for Supplementary Material

- Aspin, T.W.H., Matthews, T.J., Khamis, K., Milner, A.M., Wang, Z., O'Callaghan, M.J. and Ledger, M.E., 2018. Drought intensification drives turnover of structure and function in stream invertebrate communities. *Ecography*, 41: 1992-2004. <https://doi.org/10.1111/ecog.03711>
- Barbet-Massin, M. and Jetz, W., 2015. The effect of range changes on the functional turnover, structure and diversity of bird assemblages under future climate scenarios. *Global Change Biology*, 21: 2917-2928. <https://doi.org/10.1111/gcb.12905>
- Barnagaud, J-Y. Kissling, W.D. Tsirogianis, C. Fisikopoulos, V. Villéger, S. Sekercioglu, C.H. Svenning, J-C., 2017. Biogeographical, environmental and anthropogenic determinants of global patterns in bird taxonomic and trait turnover. *Global Ecology and Biogeography*. 26: 1190– 1200. <https://doi.org/10.1111/geb.12629>
- Baselga, A., 2010. Partitioning the turnover and nestedness components of beta diversity. *Global Ecology and Biogeography*, 19: 134-143. <https://doi.org/10.1111/j.1466-8238.2009.00490.x>
- Braghin, L.S.M., Almeida, B.A., Amaral, D.C., Canella, T.F., Gimenez, B.C.G., Bonecker, C.C., 2018. Effects of dams decrease zooplankton functional  $\beta$ -diversity in river-associated lakes. *Freshwater Biology*, 63: 721– 730. <https://doi.org/10.1111/fwb.13117>
- Brice, M.-H., Pellerin, S. and Poulin, M., 2017. Does urbanization lead to taxonomic and functional homogenization in riparian forests? *Diversity and Distributions*, 23(7): 828–840. <https://doi.org/10.1111/ddi.12565>
- Closset-Kopp, D., Hattab, T., and Decocq, G., 2018. Do drivers of forestry vehicles also drive herb layer changes (1970-2015) in a temperate forest with contrasting habitat and management conditions? *Journal of Ecology*, 107(3): 1439-1456 <https://doi.org/10.1111/1365-2745.13118>
- Crabot, J. Polášek, M. Launay, B. Pařil, P. Datry, T., 2021. Drying in newly intermittent rivers leads to higher variability of invertebrate communities. *Freshwater Biology*, 66: 730– 744. <https://doi.org/10.1111/fwb.13673>
- Damgaard, C. 2014. Estimating mean plant cover from different types of cover data: a coherent statistical framework. *Ecosphere*, 5(2): 20. <http://dx.doi.org/10.1890/ES13-00300.1>
- Fournier, B. Frey, D. and Moretti, M., 2020. The origin of urban communities: From the regional species pool to community assemblages in city. *Journal of Biogeography*, 47: 615– 629. <https://doi.org/10.1111/jbi.13772>
- Fu, H., Yuan, G., Jeppesen, E., Ge, D., Li, W., Zou, D., Huang, Z., ... and Liu, Q., 2019. Local and regional drivers of turnover and nestedness components of species and functional beta diversity in lake macrophyte communities in China. *Science of The Total Environment*, 687: 206-217. <https://doi.org/10.1016/j.scitotenv.2019.06.092>.
- Kenkel, N. and Podani, J., 1991. Plot Size and Estimation Efficiency in Plant Community Studies. *Journal of Vegetation Science*, 2(4): 539-544.
- Leigh, C. Aspin, T.W.H. Matthews, T.J. Rolls, R.J. Ledger, M.E., 2019. Drought alters the functional stability of stream invertebrate communities through time. *Journal of Biogeography*, 46: 1988– 2000. <https://doi.org/10.1111/jbi.13638>
- Liu, X. and Wang, H., 2018. Effects of loss of lateral hydrological connectivity on fish functional diversity. *Conservation Biology*, 32: 1336-1345. <https://doi.org/10.1111/cobi.13142>
- Mathers, K.L. White, J.C. Guareschi, S. Hill, M.J. Heino, J. Chadd, R., 2020. Invasive crayfish alter the long-term functional biodiversity of lotic macroinvertebrate communities. *Functional Ecology*, 34: 2350– 2361. <https://doi.org/10.1111/1365-2435.13644>
- Milberg, P., Bergstedt, J., Fridman, J., Odell, G. and Westerberg, L., 2008. Systematic and random variation vegetation monitoring data. *Journal of Vegetation Science*, 19: 633-644. <http://dx.doi.org/10.3170/2008-8-18423>.

- Nielsen, A. and Totland, Ø., 2014. Structural properties of mutualistic networks withstand habitat degradation while species functional roles might change. *Oikos*, 123: 323–333. <https://doi.org/10.1111/j.1600-0706.2013.00644.x>
- Pereyra, L.C. Akmentins, M.S. Vaira, M. Moreno, C.E., 2018. Disentangling the multiple components of anuran diversity associated to different land-uses in Yungas forests, Argentina. *Animal Conservation*, 21: 396–404. <https://doi.org/10.1111/acv.12406>
- Ringvall, A., Petersson, H., Ståhl, G. and Lämås, T., 2005. Surveyor consistency in presence/absence sampling for monitoring vegetation in a boreal forest. *Forest Ecology and Management*, 212: 109–117. <https://doi.org/10.1016/j.foreco.2005.03.002>
- Seefeldt, S.S. and Booth, D.T., 2006. Measuring Plant Cover in Sagebrush Steppe Rangelands: A Comparison of Methods. *Environmental Management*, 37: 703–711. <https://doi.org/10.1007/s00267-005-0016-6>
- Sykes, J.M., Horrill, A.D. and Mountford, M.D., 1983. Use of visual cover assessments as quantitative estimators of some British woodland taxa. *Journal of Ecology*, 71(2): 437–450. <https://doi.org/10.2307/2259726>
- Villéger, S., Grenouillet, G. and Brosse, S., 2013. Decomposing functional  $\beta$ -diversity reveals that low functional  $\beta$ -diversity is driven by low functional turnover in European fish assemblages. *Global Ecology and Biogeography*, 22(6): 671–681. <https://doi:10.1111/geb.12021>
