# Supplementary material
Source: MDPI journal article supplement (https://www.mdpi.com/2073-445X/12/5/1090)
Supplement: s1 [file s1]

Archive with 3 entries (3 files):
- Data_species.xlsx
- Data_traits.csv
- Supplementary material, 08 May 2023.pdf
