# Supplementary material
Source: MDPI journal article supplement (https://www.mdpi.com/2073-445X/12/5/1090)
Supplement: s1 [file s1 › Data_traits.csv]

My_Species	SM_Average	PHG_Average	SLA_Average	SM_sqrt	PHG_sqrt	SLA_sqrt	SM_log10	PHG_log10	SLA_log10
Acer campestre	74.43	17.14	10.50	8.62747549	4.140048309	3.240370349	1.871767468	1.234010818	1.021189299
Acer Platanoides	97.43	17.50	16.70	9.870663605	4.183300133	4.086563348	1.988692703	1.243038049	1.222716471
Acer pseudoplatanus	30.60	17.50	11.40	5.531726674	4.183300133	3.376388603	1.485721426	1.243038049	1.056904851
Achillea millefolium	0.16	0.63	9.30	0.4	0.796241169	3.049590136	-0.795880017	-0.197910742	0.968482949
Aegopodium podagraria	1.99	0.77	21.10	1.410673598	0.876885723	4.593473631	0.298853076	-0.114114002	1.324282455
Aesculus hippocastanum	6257.00	20.00	10.80	79.101201	4.472135955	3.286335345	3.796366155	1.301029996	1.033423755
Agrostis stolonifera	0.02	0.40	19.80	0.141421356	0.632455532	4.449719092	-1.698970004	-0.397940009	1.29666519
Aira caryophyllea	0.17	0.15	11.10	0.412310563	0.387298335	3.33166625	-0.769551079	-0.823908741	1.045322979
Alliaria petiolata	2.25	0.66	25.70	1.5	0.81240384	5.069516742	0.352182518	-0.180456064	1.409933123
Alnus glutinosa	1.37	17.50	12.92	1.170469991	4.183300133	3.594425773	0.136720567	1.243038049	1.111259039
Alnus Rubra	0.95	20.00	21.65	0.973858306	4.472135955	4.652421053	-0.023008455	1.301029996	1.335358025
Angelica sylvestris	1.78	1.24	20.70	1.335415042	1.114001795	4.549725266	0.251232527	0.093771781	1.315970345
Anthriscus sylvestris	4.68	1.05	20.70	2.163330765	1.026157883	4.549725266	0.670245853	0.022428371	1.315970345
Argentina anserina	0.80	0.33	30.90	0.894427191	0.570087713	5.558776844	-0.096910013	-0.488116639	1.489958479
Arrhenatherum elatius	2.39	0.90	19.80	1.545962483	0.948683298	4.449719092	0.378397901	-0.045757491	1.29666519
Artemisia vulgaris	0.12	1.39	18.30	0.346410162	1.177921899	4.277849927	-0.920818754	0.142232992	1.26245109
Arum maculatum	45.95	0.11	29.60	6.778642932	0.331662479	5.440588203	1.662285516	-0.958607315	1.471291711
Athyrium filix-femina	0.20	0.65	12.10	0.447213595	0.806225775	3.478505426	-0.698970004	-0.187086643	1.08278537
Betula pendula	0.15	17.50	12.00	0.387298335	4.183300133	3.464101615	-0.823908741	1.243038049	1.079181246
Brachypodium sylvaticum	0.62	0.90	23.80	0.787400787	0.948683298	4.878524367	-0.207608311	-0.045757491	1.376576957
Bromus racemosus	4.20	0.64	32.62	2.049390153	0.801783726	5.711392125	0.62324929	-0.191885526	1.513483957
Callitriche stagnalis	0.09	0.05	10.09	0.3	0.223606798	3.176476035	-1.045757491	-1.301029996	1.003891166
Calystegia sepium	33.90	2.00	33.10	5.822370651	1.414213562	5.753259945	1.530199698	0.301029996	1.519827994
Calystegia silvatica	37.13	2.00	23.10	6.093685256	1.414213562	4.806245936	1.569760038	0.301029996	1.36361198
Carex acuta	1.25	0.90	14.78	1.118033989	0.948683298	3.844476557	0.096910013	-0.045757491	1.169674434
Carex pendula	0.62	1.00	10.00	0.787736359	1	3.16227766	-0.207238217	0	1
Carex pseudocyperus	0.72	0.70	22.00	0.84569498	0.836660027	4.69041576	-0.145572494	-0.15490196	1.342422681
Carex remota	0.45	0.45	23.40	0.670820393	0.670820393	4.837354649	-0.346787486	-0.346787486	1.369215857
Carex riparia	2.60	1.05	11.90	1.61245155	1.024695077	3.449637662	0.414973348	0.021189299	1.075546961
Carex sylvatica	1.56	0.45	22.80	1.250859704	0.670820393	4.774934555	0.194417204	-0.346787486	1.357934847
Chaerophyllum temulum	2.21	0.66	25.80	1.486606875	0.81240384	5.07937004	0.344392274	-0.180456064	1.411619706
Chamaenerion angustifolium	0.05	1.15	28.60	0.223606798	1.071547612	5.347896783	-1.301029996	0.060022946	1.456366033
Circaea lutetiana	0.88	0.45	32.90	0.938083152	0.670820393	5.73585216	-0.055517328	-0.346787486	1.517195898
Cirsium arvense	1.20	0.90	5.40	1.095445115	0.948683298	2.323790008	0.079181246	-0.045757491	0.73239376
Corylus avellana	1080.00	3.75	11.10	32.86335345	1.936491673	3.33166625	3.033423755	0.574031268	1.045322979
Crataegus monogyna	112.40	6.17	8.26	10.60188662	2.483277404	2.874797873	2.050766311	0.790050474	0.91721463
Dactylis glomerata	0.51	0.89	16.40	0.714142843	0.940744386	4.049691346	-0.292429824	-0.053056729	1.214843848
Dioscorea communis	16.00	2.25	35.10	4	1.5	5.924525297	1.204119983	0.352182518	1.545307116
Epilobium ciliatum	0.10	0.86	57.36	0.3082207	0.928708781	7.573638492	-1.022276395	-0.064240896	1.758609143
Epilobium hirsutum	0.12	1.15	38.00	0.339116499	1.072380529	6.164414003	-0.93930216	0.06069784	1.579783597
Epilobium montanum	0.12	0.44	33.40	0.346410162	0.659966329	5.779273311	-0.920818754	-0.360956442	1.523746467
Equisetum arvense	0.20	0.33	9.90	0.447213595	0.570087713	3.146583878	-0.698970004	-0.488116639	0.995678626
Eupatorium cannabinum	0.42	0.94	37.00	0.64807407	0.968245837	6.08276253	-0.37675071	-0.028028724	1.568201724
Fagus sylvatica	22.50	32.50	22.19	4.74341649	5.700877125	4.711032997	1.352182518	1.511883361	1.346232292
Filipendula ulmaria	0.99	1.17	53.90	0.994987437	1.079529812	7.341661937	-0.004364805	0.066469281	1.731588765
Foeniculum vulgare	7.10	1.30	9.80	2.664582519	1.140175425	3.130495168	0.851258349	0.113943352	0.991226076
Fraxinus excelsior	29.30	22.50	13.80	5.412947441	4.74341649	3.714835124	1.46686762	1.352182518	1.139879086
Galium aparine	6.95	1.14	62.30	2.636285265	1.06653645	7.893034904	0.841984805	0.055951405	1.794488047
Galium palustre	0.91	0.38	52.70	0.953939201	0.618177044	7.259476565	-0.040958608	-0.417774254	1.721810615
Geranium robertianum	1.57	0.26	25.58	1.252996409	0.504975247	5.057667447	0.195899652	-0.59345982	1.40790054
Geum urbanum	1.89	0.65	48.80	1.372953022	0.806225775	6.985699679	0.275311355	-0.187086643	1.688419822
Glechoma hederacea	0.69	0.20	46.08	0.830662386	0.447213595	6.788442333	-0.161150909	-0.698970004	1.663540266
Hedera helix	27.70	8.94	14.80	5.263078947	2.989565186	3.847076812	1.442479769	0.951216055	1.170261715
Heracleum sphondylium	5.75	1.06	27.00	2.397915762	1.030776406	5.196152423	0.759667845	0.026328939	1.431363764
Holcus lanatus	0.41	0.53	48.80	0.640312424	0.724568837	6.985699679	-0.387216143	-0.279840697	1.688419822
Hordeum murinum	8.20	0.37	46.00	2.863564213	0.611788946	6.782329983	0.913813852	-0.426796749	1.662757832
Humulus lupulus	3.51	3.00	36.30	1.872431574	1.732050808	6.024948133	0.544811912	0.477121255	1.559906625
Ilex aquifolium	28.26	3.50	10.20	5.316295703	1.870828693	3.193743885	1.451218259	0.544068044	1.008600172
Iris pseudacorus	35.50	0.80	19.70	5.958187644	0.894427191	4.438468204	1.550228353	-0.096910013	1.294466226
Jacobaea vulgaris	0.18	0.69	32.90	0.428174419	0.830662386	5.73585216	-0.736758565	-0.161150909	1.517195898
Juncus effusus	0.01	0.90	28.20	0.1	0.948683298	5.310367219	-2	-0.045757491	1.450249108
Juncus tenuis	0.02	0.36	18.45	0.130384048	0.600694043	4.295346319	-1.769551079	-0.44269335	1.26599637
Lamium Album	1.48	0.35	51.60	1.215181742	0.591607978	7.183313998	0.169282472	-0.455931956	1.712649702
Lapsana communis	1.43	0.63	60.20	1.197219	0.790569415	7.758865897	0.156347201	-0.204119983	1.779596491
Lathyrus pratensis	13.60	0.50	38.80	3.687817783	0.710092085	6.228964601	1.133538908	-0.297370656	1.588831726
Laurus Nobilis	714.30	12.00	10.70	26.72639145	3.464101615	3.271085447	2.85388065	1.079181246	1.029383778
Leucanthemum vulgare	0.34	0.45	33.44	0.585946528	0.670820393	5.783149319	-0.46428403	-0.346787486	1.524328812
Lolium perenne	1.79	0.48	42.20	1.337908816	0.691013748	6.496152708	0.252853031	-0.321026624	1.625312451
Lotus corniculatus	1.33	0.41	31.00	1.15181017	0.63900965	5.567764363	0.122761817	-0.388985166	1.491361694
Lycopus europaeus	0.23	0.73	65.33	0.482161799	0.851469318	8.082697569	-0.633614403	-0.139661993	1.815112658
Lysimachia nummularia	0.50	0.30	38.70	0.707106781	0.547722558	6.220932406	-0.301029996	-0.522878745	1.587710965
Lysimachia vulgaris	0.37	0.96	42.20	0.604979338	0.981495458	6.496152708	-0.436518915	-0.016223412	1.625312451
Lythrum salicaria	0.06	0.79	41.80	0.244948974	0.887411967	6.46529195	-1.22184875	-0.103749438	1.621176282
Malva moschata	2.21	0.50	22.70	1.486102285	0.707106781	4.7644517	0.344097404	-0.301029996	1.356025857
Matricaria discoidea	0.08	0.18	18.30	0.282842712	0.418330013	4.277849927	-1.096910013	-0.756961951	1.26245109
Medicago lupulina	1.85	0.32	34.60	1.360147051	0.561248608	5.882176468	0.267171728	-0.501689446	1.539076099
Melica uniflora	2.78	0.39	39.60	1.6673332	0.62249498	6.292853089	0.444044796	-0.411728293	1.597695186
Mentha aquatica	0.14	0.50	48.93	0.374165739	0.707106781	6.994998213	-0.853871964	-0.301029996	1.689575216
Mercurialis perennis	2.20	0.23	33.90	1.483239697	0.474341649	5.822370651	0.342422681	-0.647817482	1.530199698
Oenanthe crocata	3.46	0.80	41.60	1.860107524	0.894427191	6.449806199	0.539076099	-0.096910013	1.619093331
Pentaglottis sempervirens	4.95	0.80	30.15	2.224859546	0.894427191	5.490901565	0.694605199	-0.096910013	1.479287316
Persicaria lapathifolia	6.39	0.53	27.60	2.527844932	0.724568837	5.253570215	0.805500858	-0.279840697	1.440909082
Persicaria maculosa	2.50	0.46	36.10	1.580084386	0.680073525	6.008327554	0.397360563	-0.334888263	1.557507202
Phalaris arundinacea	0.67	1.46	35.10	0.818535277	1.209338662	5.924525297	-0.173925197	0.165095875	1.545307116
Phleum pratense	0.45	0.50	36.20	0.670820393	0.707106781	6.016643583	-0.346787486	-0.301029996	1.558708571
Plantago lanceolata	1.60	0.40	31.59	1.264911064	0.634607968	5.620498199	0.204119983	-0.394988959	1.499549626
Plantago major	0.21	0.21	30.50	0.458257569	0.454147553	5.522680509	-0.677780705	-0.685606043	1.484299839
Poa Annua	0.31	0.16	56.41	0.556776436	0.396862697	7.510659092	-0.508638306	-0.802719442	1.7513561
Poa pratensis	0.25	0.53	31.40	0.5	0.724568837	5.60357029	-0.602059991	-0.279840697	1.496929648
Polygonum aviculare	1.69	0.28	33.67	1.3	0.524404424	5.802588532	0.227886705	-0.560667306	1.527243551
Populus tremula	0.10	17.50	23.52	0.316227766	4.183300133	4.849742261	-1	1.243038049	1.371437317
Potentilla indica	0.28	0.10	30.28	0.529150262	0.316227766	5.502726597	-0.552841969	-1	1.481155871
Potentilla reptans	0.28	0.15	35.03	0.529150262	0.387298335	5.918614703	-0.552841969	-0.823908741	1.544440137
Prunella vulgaris	0.60	0.20	43.60	0.774596669	0.443283205	6.603029608	-0.22184875	-0.706637445	1.639486489
Prunus Domestica	799.67	3.50	8.31	28.27836629	1.870828693	2.882707061	2.902908631	0.544068044	0.919601024
Prunus laurocerasus	340.00	6.00	10.00	18.43908891	2.449489743	3.16227766	2.531478917	0.77815125	1
Prunus Serotina	88.10	9.00	24.44	9.386160024	3	4.943682838	1.944975908	0.954242509	1.388101202
Pteridium aquilinum	0.10	1.04	28.30	0.316227766	1.020620726	5.319774431	-1	0.017728767	1.451786436
Quercus robur	3853.00	40.00	19.40	62.07253821	6.32455532	4.404543109	3.585799009	1.602059991	1.28780173
Ranunculus repens	2.06	0.42	39.20	1.435270009	0.651034679	6.260990337	0.31386722	-0.372791753	1.593286067
Rosa Multiflora	5.63	1.50	31.73	2.372059583	1.224744871	5.632583777	0.750251188	0.176091259	1.50141532
Rubus caesius	7.90	0.45	29.10	2.810693865	0.670820393	5.394441584	0.897627091	-0.346787486	1.463892989
Rubus fruticosus agg.	6	4.5	22.5	2.449489743	2.121320344	4.74341649	0.77815125	0.653212514	1.352182518
Rubus idaeus	2.70	1.21	28.82	1.643167673	1.09793194	5.368426213	0.431363764	0.081150839	1.459693976
Rumex conglomeratus	1.60	0.55	22.00	1.264911064	0.741619849	4.69041576	0.204119983	-0.259637311	1.342422681
Rumex crispus	1.78	1.05	43.30	1.332916602	1.024695077	6.580273551	0.249605954	0.021189299	1.636487896
Rumex obtusifolius	1.53	0.88	49.84	1.238278375	0.937321412	7.059745038	0.185636577	-0.056222924	1.697578034
Rumex pulcher	1.30	0.38	54.70	1.140175425	0.612372436	7.395944835	0.113943352	-0.425968732	1.737987326
Rumex sanguineus	0.76	0.68	25.00	0.871779789	0.821583836	5	-0.119186408	-0.170696227	1.397940009
Salix alba	0.12	18.00	12.34	0.346410162	4.242640687	3.512833614	-0.920818754	1.255272505	1.09131516
Salix caprea	0.09	5.50	18.10	0.3	2.34520788	4.254409477	-1.045757491	0.740362689	1.257678575
Salix cinerea	0.09	2.75	10.87	0.3	1.658312395	3.296968304	-1.045757491	0.439332694	1.036229544
Scrophularia auriculata	0.11	0.71	35.20	0.331662479	0.844097151	5.93295879	-0.958607315	-0.147215131	1.546542663
Scutellaria galericulata	0.70	0.25	47.28	0.836660027	0.5	6.876045375	-0.15490196	-0.602059991	1.674677468
Solanum dulcamara	2.08	1.15	53.70	1.440486029	1.072380529	7.328028384	0.317018101	0.06069784	1.729974286
Sorbus aucuparia	4.68	11.13	17.80	2.162174831	3.335416016	4.219004622	0.669781615	1.04630002	1.250420002
Stachys palustris	1.34	0.65	44.90	1.158663023	0.806225775	6.700746227	0.127914294	-0.187086643	1.652246341
Stachys sylvatica	1.40	0.69	44.70	1.183215957	0.83112528	6.68580586	0.146128036	-0.160667016	1.650307523
Taraxacum officinale agg.	0.75	0.2	37.5	0.866025404	0.447213595	6.123724357	-0.124938737	-0.698970004	1.574031268
Trifolium pratense	1.63	0.37	39.17	1.274754878	0.604743157	6.258270448	0.210853365	-0.436858075	1.592908654
Trifolium repens	0.72	0.35	39.90	0.848528137	0.591607978	6.316644679	-0.142667504	-0.455931956	1.600972896
Ulex europaeus	6.59	1.00	11.80	2.567099531	1	3.435112807	0.818885415	0	1.071882007
Ulmus minor	4.86	20.50	34.85	2.204540769	4.527692569	5.903388857	0.686636269	1.311753861	1.542202782
Urtica dioica	0.20	1.05	42.90	0.447213595	1.022252415	6.549809158	-0.698970004	0.01911629	1.632457292
Urtica urens	0.50	0.35	21.00	0.707106781	0.591607978	4.582575695	-0.301029996	-0.455931956	1.322219295
Veronica americana	0.11	0.18	28.48	0.331662479	0.422710552	5.336745932	-0.958607315	-0.747913822	1.454553055
Veronica chamaedrys	0.25	0.26	49.67	0.5	0.510933099	7.047694659	-0.602059991	-0.583271924	1.69609416
Veronica montana	0.61	0.26	44.17	0.777817459	0.506211418	6.646051459	-0.218244625	-0.591336126	1.645127399
Vicia cracca	14.29	0.93	35.97	3.780211634	0.964365076	5.997568183	1.155032229	-0.031517051	1.555950388
Vicia sepium	26.00	0.43	50.60	5.099019514	0.658732549	7.113367698	1.414973348	-0.362581753	1.704150517
